# Supplementary material for: The feasibility of utilizing the open dynamic interaction network (ODIN) app to assess rEMA data across 30 days among those recovering from alcohol use disorders
Source: PubMed Central journal article supplement (PMC11665290; doi:10.1016/j.dadr.2024.100305), 2024-12-04
Supplement: mmc1.pdf [file mmc1.pdf]

# CASA Final

LNC ODIN Platform

September 27, 2022

## Contents

|                                                   |    |
|---------------------------------------------------|----|
| AA_importance                                     | 3  |
| access_time                                       | 4  |
| affect_GPS_alcohol                                | 5  |
| affect_intensity                                  | 6  |
| affect_type                                       | 7  |
| alcohol_use                                       | 8  |
| details_GPS_support (DISABLED)                    | 9  |
| details_GPS_support_updated (DISABLED)            | 10 |
| details_GPS_support_updated_08242022 (DISABLED)   | 11 |
| details_GPS_support_updated_08302022              | 12 |
| intensity_GPS_alcohol (DISABLED)                  | 13 |
| intensity_GPS_alcohol_updated_08242022 (DISABLED) | 14 |
| intensity_GPS_alcohol_updated_08302022            | 15 |
| stress_cause                                      | 16 |
| stress_extent                                     | 17 |
| support_details                                   | 18 |
| support_occurrence                                | 19 |

|                         |           |
|-------------------------|-----------|
| <b>urge_GPS_alcohol</b> | <b>20</b> |
| <b>urge_extent</b>      | <b>21</b> |

## **Study Details**

Name: CASA Final  
Description: 10/29/2021 revision. Actual radii. Support locations.  
Duration: 30 days

## AA\_importance

Column name: AA\_importance

Question Text: On a scale from 1 to 10, where 1 is not at all important and 10 is very important, how important is it for you to attend sober support meetings?

Description: No description provided by researcher

Question Type: single\_select

| value | choice text              | choice count | total percent |
|-------|--------------------------|--------------|---------------|
| 1     | 1 (not at all important) | 53           | 6.9%          |
| 2     | 2                        | 8            | 1.0%          |
| 3     | 3                        | 12           | 1.6%          |
| 4     | 4                        | 25           | 3.3%          |
| 5     | 5                        | 25           | 3.3%          |
| 6     | 6                        | 12           | 1.6%          |
| 7     | 7                        | 33           | 4.3%          |
| 8     | 8                        | 80           | 10.4%         |
| 9     | 9                        | 102          | 13.3%         |
| 10    | 10 (very important)      | 416          | 54.2%         |
| 999   | skipped                  | 0            | 0.0%          |
| 1000  | unset                    | 1            | 0.1%          |
| 1001  | expired                  | 1            | 0.1%          |
|       | Total                    | 768          |               |
|       | Percentage               |              | 100.0%        |

- rule\_id: 5 (Followup Rule)

Active in participant groups: 1

Time to expire: 3 hours, 30 mins

Rule-specific parameters

Triggering question: support\_occurrence (page 19)

Delay between triggering question and this one: 0 sec(s)

Triggering answers: 1002,999

- rule\_id: 6 (Followup Rule)

Active in participant groups: 1

Time to expire: 3 hours, 30 mins

Rule-specific parameters

Triggering question: support\_details (page 18)

Delay between triggering question and this one: 0 sec(s)

Triggering answers: any value,999

## access\_time

Column name: access\_time\_#choice\_id

Question Text: At what times did you have access to alcohol <u>yesterday</u>, for example at a gas station or a friends house? Select all that apply.

Description: No description provided by researcher

Question Type: multi\_select

Min: 1

Max: 6

Number of 0/1 columns: 10

| choice id | choice text                                | choice count | total percent | fractional count | fractional percent |
|-----------|--------------------------------------------|--------------|---------------|------------------|--------------------|
| 1         | Between 12:01am and 9am                    | 68           | 5.1%          | 38.4             | 4.3%               |
| 2         | Between 9:01am and Noon                    | 107          | 8.1%          | 38.0             | 4.2%               |
| 3         | Between 12:01pm and 3pm                    | 136          | 10.3%         | 59.2             | 6.6%               |
| 4         | Between 3:01pm and 6pm                     | 161          | 12.2%         | 69.5             | 7.8%               |
| 5         | Between 6:01pm and 9pm                     | 247          | 18.7%         | 151.5            | 16.9%              |
| 6         | Between 9:01pm and Midnight                | 119          | 9.0%          | 54.5             | 6.1%               |
| 999       | skipped                                    | 1            | 0.1%          | 1.0              | 0.1%               |
| 1000      | unset                                      | 0            | 0.0%          | 0.0              | 0.0%               |
| 1001      | expired                                    | 123          | 9.3%          | 123.0            | 13.7%              |
| 1002      | I did not have access to alcohol yesterday | 361          | 27.3%         | 361.0            | 40.3%              |
|           | Total                                      | 1323         |               | 896.0            |                    |
|           | Percentage                                 |              |               |                  | 100.0%             |

- rule\_id: 1 (Time Rule)

Active in participant groups: 1

Time to expire: 3 hours, 30 mins

Rule-specific parameters

Time schedule: At 10:00 AM

## affect\_GPS\_alcohol

Column name: affect\_GPS\_alcohol\_#choice\_id  
 Question Text: Choose up to three emotions that you are feeling <u>right now</u>.  
 Description: No description provided by researcher  
 Question Type: multi\_select  
 Min: 1  
 Max: 3  
 Number of 0/1 columns: 13

| choice id | choice text | choice count | total percent | fractional count | fractional percent |
|-----------|-------------|--------------|---------------|------------------|--------------------|
| 1         | Upset       | 59           | 3.9%          | 29.2             | 4.5%               |
| 2         | Hostile     | 35           | 2.3%          | 16.7             | 2.6%               |
| 3         | Alert       | 253          | 16.6%         | 101.8            | 15.8%              |
| 4         | Ashamed     | 42           | 2.8%          | 21.0             | 3.3%               |
| 5         | Inspired    | 179          | 11.7%         | 72.2             | 11.2%              |
| 6         | Nervous     | 73           | 4.8%          | 31.5             | 4.9%               |
| 7         | Determined  | 316          | 20.7%         | 124.5            | 19.3%              |
| 8         | Attentive   | 193          | 12.6%         | 84.2             | 13.1%              |
| 9         | Afraid      | 47           | 3.1%          | 19.3             | 3.0%               |
| 10        | Active      | 322          | 21.1%         | 135.7            | 21.1%              |
| 999       | skipped     | 0            | 0.0%          | 0.0              | 0.0%               |
| 1000      | unset       | 0            | 0.0%          | 0.0              | 0.0%               |
| 1001      | expired     | 8            | 0.5%          | 8.0              | 1.2%               |
|           | Total       | 1527         |               | 644.0            |                    |
|           | Percentage  |              |               |                  | 100.0%             |

- rule\_id: 14 (Followup Rule)

Active in participant groups: 1  
 Time to expire: 1 hour

### Rule-specific parameters

Triggering question: intensity\_GPS\_alcohol (page 13)  
 Delay between triggering question and this one: 0 sec(s)  
 Triggering answers: any value,999

## affect\_intensity

Column name: affect\_intensity  
Question Text: How are you feeling <u>right now</u>?  
Description: No description provided by researcher  
Question Type: single\_select

| value | choice text | choice count | total percent |
|-------|-------------|--------------|---------------|
| 1     | Very good   | 1158         | 49.7%         |
| 2     | Good        | 623          | 26.7%         |
| 3     | Neutral     | 454          | 19.5%         |
| 4     | Bad         | 71           | 3.0%          |
| 5     | Very bad    | 17           | 0.7%          |
| 999   | skipped     | 0            | 0.0%          |
| 1000  | unset       | 1            | 0.0%          |
| 1001  | expired     | 7            | 0.3%          |
|       | Total       | 2331         |               |
|       | Percentage  |              | 100.0%        |

- rule\_id: 9 (Followup Rule)
  - Active in participant groups: 1
  - Time to expire: 3 hours, 30 mins
  - Rule-specific parameters
    - Triggering question: urge\_extent (page 21)
    - Delay between triggering question and this one: 0 sec(s)
    - Triggering answers: any value,999

## affect\_type

Column name: affect\_type\_#choice\_id  
 Question Text: Choose up to three emotions that you are feeling <u>right now</u>.  
 Description: No description provided by researcher  
 Question Type: multi\_select  
 Min: 1  
 Max: 3  
 Number of 0/1 columns: 13

| choice id | choice text | choice count | total percent | fractional count | fractional percent |
|-----------|-------------|--------------|---------------|------------------|--------------------|
| 1         | Upset       | 242          | 4.5%          | 123.0            | 5.3%               |
| 2         | Hostile     | 99           | 1.9%          | 45.5             | 2.0%               |
| 3         | Alert       | 797          | 14.9%         | 342.3            | 14.8%              |
| 4         | Ashamed     | 130          | 2.4%          | 59.2             | 2.6%               |
| 5         | Inspired    | 742          | 13.9%         | 323.0            | 13.9%              |
| 6         | Nervous     | 313          | 5.9%          | 143.0            | 6.2%               |
| 7         | Determined  | 1000         | 18.7%         | 426.5            | 18.4%              |
| 8         | Attentive   | 840          | 15.7%         | 356.0            | 15.4%              |
| 9         | Afraid      | 145          | 2.7%          | 60.8             | 2.6%               |
| 10        | Active      | 1029         | 19.3%         | 433.7            | 18.7%              |
| 999       | skipped     | 2            | 0.0%          | 2.0              | 0.1%               |
| 1000      | unset       | 0            | 0.0%          | 0.0              | 0.0%               |
| 1001      | expired     | 3            | 0.1%          | 3.0              | 0.1%               |
|           | Total       | 5342         |               | 2318.0           |                    |
|           | Percentage  |              |               |                  | 100.0%             |

- rule\_id: 10 (Followup Rule)

Active in participant groups: 1

Time to expire: 3 hours, 30 mins

Rule-specific parameters

Triggering question: affect\_intensity (page 6)

Delay between triggering question and this one: 0 sec(s)

Triggering answers: any value,999

## alcohol\_use

Column name: alcohol\_use

Question Text: How many alcoholic drinks did you have <u>yesterday</u>?

Description: No description provided by researcher

Question Type: single\_select

| value | choice text                       | choice count | total percent |
|-------|-----------------------------------|--------------|---------------|
| 1     | 1 drink or less than a full drink | 6            | 0.8%          |
| 2     | 2-3 drinks                        | 4            | 0.5%          |
| 3     | 4-5 drinks                        | 7            | 0.9%          |
| 4     | 6 or more drinks                  | 4            | 0.5%          |
| 999   | skipped                           | 0            | 0.0%          |
| 1000  | unset                             | 0            | 0.0%          |
| 1001  | expired                           | 5            | 0.6%          |
| 1002  | I did not drink alcohol yesterday | 747          | 96.6%         |
|       | Total                             | 773          |               |
|       | Percentage                        |              | 100.0%        |

- rule\_id: 2 (Followup Rule)

Active in participant groups: 1

Time to expire: 3 hours, 30 mins

Rule-specific parameters

Triggering question: access\_time (page 4)

Delay between triggering question and this one: 0 sec(s)

Triggering answers: any value,999



## details\_GPS\_support (DISABLED)

Column name: details\_GPS\_support\_#choice\_id

Question Text: If you attended a sober support meeting in the <u>last three hours</u>, please indicate which of the following activities you were involved in? Select all that apply.

Description: No description provided by researcher

Question Type: multi\_select

Min: 1

Max: 5

Number of 0/1 columns: 9

| choice id | choice text                       | choice count | total percent | fractional count | fractional percent |
|-----------|-----------------------------------|--------------|---------------|------------------|--------------------|
| 1         | Mostly listened to others         | 5            | 55.6%         | 3.8              | 63.9%              |
| 2         | Talked during breaks              | 1            | 11.1%         | 0.3              | 5.6%               |
| 3         | Obtained or talked with a sponsor | 0            | 0.0%          | 0.0              | 0.0%               |
| 4         | Spoke at the meeting              | 2            | 22.2%         | 0.8              | 13.9%              |
| 5         | Took a service position           | 0            | 0.0%          | 0.0              | 0.0%               |
| 999       | skipped                           | 0            | 0.0%          | 0.0              | 0.0%               |
| 1000      | unset                             | 0            | 0.0%          | 0.0              | 0.0%               |
| 1001      | expired                           | 1            | 11.1%         | 1.0              | 16.7%              |
| 1002      | I did not attend any meeting      | 0            | 0.0%          | 0.0              | 0.0%               |
|           | Total                             | 9            |               | 6.0              |                    |
|           | Percentage                        |              |               |                  | 100.0%             |

## details\_GPS\_support\_updated (DISABLED)

Column name: details\_GPS\_support\_updated\_#choice\_id

Question Text: If you attended a sober support meeting in the <u>last three hours</u>, please indicate which of the following activities you were involved in? Select all that apply.

Description: No description provided by researcher

Question Type: multi\_select

Min: 1

Max: 5

Number of 0/1 columns: 9

| choice id | choice text                       | choice count | total percent | fractional count | fractional percent |
|-----------|-----------------------------------|--------------|---------------|------------------|--------------------|
| 1         | Mostly listened to others         | 44           | 63.8%         | 40.8             | 69.1%              |
| 2         | Talked during breaks              | 10           | 14.5%         | 5.8              | 9.7%               |
| 3         | Obtained or talked with a sponsor | 1            | 1.4%          | 0.2              | 0.4%               |
| 4         | Spoke at the meeting              | 11           | 15.9%         | 9.2              | 15.7%              |
| 5         | Took a service position           | 0            | 0.0%          | 0.0              | 0.0%               |
| 999       | skipped                           | 0            | 0.0%          | 0.0              | 0.0%               |
| 1000      | unset                             | 0            | 0.0%          | 0.0              | 0.0%               |
| 1001      | expired                           | 3            | 4.3%          | 3.0              | 5.1%               |
| 1002      | I did not attend any meeting      | 0            | 0.0%          | 0.0              | 0.0%               |
|           | Total Percentage                  | 69           |               | 59.0             | 100.0%             |

**details\_GPS\_support\_updated\_08242022 (DISABLED)**

Column name: details\_GPS\_support\_updated\_08242022\_#choice\_id  
 Question Text: If you attended a sober support meeting in the <u>last three hours</u>, please indicate which of the following activities you were involved in? Select all that apply.  
 Description: No description provided by researcher  
 Question Type: multi\_select  
 Min: 1  
 Max: 5  
 Number of 0/1 columns: 9

| choice id | choice text                       | choice count | total percent | fractional count | fractional percent |
|-----------|-----------------------------------|--------------|---------------|------------------|--------------------|
| 1         | Mostly listened to others         | 0            | 0.0%          | 0.0              | 0.0%               |
| 2         | Talked during breaks              | 0            | 0.0%          | 0.0              | 0.0%               |
| 3         | Obtained or talked with a sponsor | 0            | 0.0%          | 0.0              | 0.0%               |
| 4         | Spoke at the meeting              | 0            | 0.0%          | 0.0              | 0.0%               |
| 5         | Took a service position           | 0            | 0.0%          | 0.0              | 0.0%               |
| 999       | skipped                           | 0            | 0.0%          | 0.0              | 0.0%               |
| 1000      | unset                             | 0            | 0.0%          | 0.0              | 0.0%               |
| 1001      | expired                           | 0            | 0.0%          | 0.0              | 0.0%               |
| 1002      | I did not attend any meeting      | 0            | 0.0%          | 0.0              | 0.0%               |
|           | Total                             | 0            |               | 0.0              |                    |
|           | Percentage                        |              |               |                  | 0.0%               |

## details\_GPS\_support\_updated\_08302022

Column name: details\_GPS\_support\_updated\_08302022\_#choice\_id  
 Question Text: If you attended a sober support meeting in the <u>last three hours</u>, please indicate which of the following activities you were involved in? Select all that apply.  
 Description: No description provided by researcher  
 Question Type: multi\_select  
 Min: 1  
 Max: 5  
 Number of 0/1 columns: 9

| choice id | choice text                       | choice count | total percent | fractional count | fractional percent |
|-----------|-----------------------------------|--------------|---------------|------------------|--------------------|
| 1         | Mostly listened to others         | 5            | 35.7%         | 4.5              | 37.5%              |
| 2         | Talked during breaks              | 3            | 21.4%         | 2.0              | 16.7%              |
| 3         | Obtained or talked with a sponsor | 0            | 0.0%          | 0.0              | 0.0%               |
| 4         | Spoke at the meeting              | 4            | 28.6%         | 3.5              | 29.2%              |
| 5         | Took a service position           | 0            | 0.0%          | 0.0              | 0.0%               |
| 999       | skipped                           | 0            | 0.0%          | 0.0              | 0.0%               |
| 1000      | unset                             | 0            | 0.0%          | 0.0              | 0.0%               |
| 1001      | expired                           | 2            | 14.3%         | 2.0              | 16.7%              |
| 1002      | I did not attend any meeting      | 0            | 0.0%          | 0.0              | 0.0%               |
|           | Total                             | 14           |               | 12.0             |                    |
|           | Percentage                        |              |               |                  | 100.0%             |

- rule\_id: 39 (GPS Rule)

Active in participant groups: 1  
 Time to expire: 2 hours, 30 mins

Rule-specific parameters

Locations: [{"lat":40.14349646,"long":-97 ... 40,"sched":{"0 19 \* \* 5":60}}]  
 text-truncated (length: 6909)

## intensity\_GPS\_alcohol (DISABLED)

Column name: intensity\_GPS\_alcohol  
Question Text: How are you feeling <u>right now</u>?  
Description: No description provided by researcher  
Question Type: single\_select

| value | choice text      | choice count | total percent |
|-------|------------------|--------------|---------------|
| 1     | Very good        | 464          | 53.3%         |
| 2     | Good             | 119          | 13.7%         |
| 3     | Neutral          | 55           | 6.3%          |
| 4     | Bad              | 14           | 1.6%          |
| 5     | Very bad         | 6            | 0.7%          |
| 999   | skipped          | 1            | 0.1%          |
| 1000  | unset            | 6            | 0.7%          |
| 1001  | expired          | 206          | 23.7%         |
|       | Total Percentage | 871          | 100.0%        |

## intensity\_GPS\_alcohol\_updated\_08242022 (DISABLED)

Column name: intensity\_GPS\_alcohol\_updated\_08242022  
Question Text: How are you feeling <u>right now</u>?  
Description: No description provided by researcher  
Question Type: single\_select

| value | choice text | choice count | total percent |
|-------|-------------|--------------|---------------|
| 1     | Very good   | 0            | 0.0%          |
| 2     | Good        | 0            | 0.0%          |
| 3     | Neutral     | 0            | 0.0%          |
| 4     | Bad         | 0            | 0.0%          |
| 5     | Very bad    | 0            | 0.0%          |
| 999   | skipped     | 0            | 0.0%          |
| 1000  | unset       | 0            | 0.0%          |
| 1001  | expired     | 0            | 0.0%          |
|       | Total       | 0            |               |
|       | Percentage  |              | 0.0%          |

## intensity\_GPS\_alcohol\_updated\_08302022

Column name: intensity\_GPS\_alcohol\_updated\_08302022  
Question Text: How are you feeling <u>right now</u>?  
Description: No description provided by researcher  
Question Type: single\_select

| value | choice text | choice count | total percent |
|-------|-------------|--------------|---------------|
| 1     | Very good   | 3            | 14.3%         |
| 2     | Good        | 0            | 0.0%          |
| 3     | Neutral     | 4            | 19.0%         |
| 4     | Bad         | 1            | 4.8%          |
| 5     | Very bad    | 0            | 0.0%          |
| 999   | skipped     | 0            | 0.0%          |
| 1000  | unset       | 0            | 0.0%          |
| 1001  | expired     | 13           | 61.9%         |
|       | Total       | 21           |               |
|       | Percentage  |              | 100.0%        |

- rule\_id: 40 (GPS Rule)

Active in participant groups: 1  
Time to expire: 1 hour

Rule-specific parameters

Locations: [{"lat":40.73766217,"long":-96 ... 0,"sched":{"0 11 \* \* \*":480}}]  
text-truncated (length: 38222)

## stress\_cause

Column name: stress\_cause\_#choice\_id  
Question Text: Choose up to three things that are stressing you out <u>right now</u>.  
Description: No description provided by researcher  
Question Type: multi\_select  
Min: 1  
Max: 3  
Number of 0/1 columns: 14

| choice id | choice text           | choice count | total percent | fractional count | fractional percent |
|-----------|-----------------------|--------------|---------------|------------------|--------------------|
| 1         | Family relationships  | 599          | 12.4%         | 265.7            | 11.6%              |
| 2         | Financial             | 998          | 20.6%         | 365.2            | 16.0%              |
| 3         | Work                  | 986          | 20.4%         | 412.8            | 18.1%              |
| 4         | Transportation        | 838          | 17.3%         | 373.7            | 16.3%              |
| 5         | Alcohol use treatment | 94           | 1.9%          | 49.0             | 2.1%               |
| 6         | Healthcare access     | 68           | 1.4%          | 28.8             | 1.3%               |
| 7         | Physical Health       | 163          | 3.4%          | 72.0             | 3.1%               |
| 8         | Friends               | 157          | 3.2%          | 64.3             | 2.8%               |
| 9         | Legal                 | 452          | 9.3%          | 213.5            | 9.3%               |
| 10        | Other                 | 121          | 2.5%          | 77.0             | 3.4%               |
| 999       | skipped               | 1            | 0.0%          | 1.0              | 0.0%               |
| 1000      | unset                 | 0            | 0.0%          | 0.0              | 0.0%               |
| 1001      | expired               | 4            | 0.1%          | 4.0              | 0.2%               |
| 1002      | Nothing               | 359          | 7.4%          | 359.0            | 15.7%              |
|           | Total                 | 4840         |               | 2286.0           |                    |
|           | Percentage            |              |               |                  | 100.0%             |

- rule\_id: 12 (Followup Rule)

Active in participant groups: 1  
Time to expire: 3 hours, 30 mins

### Rule-specific parameters

Triggering question: stress\_extent (page 17)  
Delay between triggering question and this one: 0 sec(s)  
Triggering answers: any value,999



## stress\_extent

Column name: stress\_extent

Question Text: On a scale of 1-10, where 1 is the least stressed and 10 is the most stressed, how stressed are you <u>right now</u>?

Description: No description provided by researcher

Question Type: single\_select

| value | choice text        | choice count | total percent |
|-------|--------------------|--------------|---------------|
| 1     | 1 (least stressed) | 1000         | 43.5%         |
| 2     | 2                  | 288          | 12.5%         |
| 3     | 3                  | 312          | 13.6%         |
| 4     | 4                  | 189          | 8.2%          |
| 5     | 5                  | 191          | 8.3%          |
| 6     | 6                  | 112          | 4.9%          |
| 7     | 7                  | 93           | 4.0%          |
| 8     | 8                  | 65           | 2.8%          |
| 9     | 9                  | 19           | 0.8%          |
| 10    | 10 (most stressed) | 25           | 1.1%          |
| 999   | skipped            | 1            | 0.0%          |
| 1000  | unset              | 0            | 0.0%          |
| 1001  | expired            | 6            | 0.3%          |
|       | Total              | 2301         |               |
|       | Percentage         |              | 100.0%        |

- rule\_id: 11 (Followup Rule)

Active in participant groups: 1

Time to expire: 3 hours, 30 mins

Rule-specific parameters

Triggering question: affect\_type (page 7)

Delay between triggering question and this one: 0 sec(s)

Triggering answers: any value,999

## support\_\_details

Column name: support\_details\_#choice\_id  
 Question Text: What activities were you involved in during the sober support meeting(s) you attended <u>yesterday</u>? Select all that apply.  
 Description: No description provided by researcher  
 Question Type: multi\_select  
 Min: 1  
 Max: 5  
 Number of 0/1 columns: 8

| choice id | choice text                       | choice count | total percent | fractional count | fractional percent |
|-----------|-----------------------------------|--------------|---------------|------------------|--------------------|
| 1         | Mostly listened to others         | 246          | 45.8%         | 217.7            | 49.7%              |
| 2         | Talked during breaks              | 69           | 12.8%         | 45.0             | 10.3%              |
| 3         | Obtained or talked with a sponsor | 33           | 6.1%          | 22.8             | 5.2%               |
| 4         | Spoke at the meeting              | 175          | 32.6%         | 142.2            | 32.5%              |
| 5         | Took a service position           | 14           | 2.6%          | 10.3             | 2.4%               |
| 999       | skipped                           | 0            | 0.0%          | 0.0              | 0.0%               |
| 1000      | unset                             | 0            | 0.0%          | 0.0              | 0.0%               |
| 1001      | expired                           | 0            | 0.0%          | 0.0              | 0.0%               |
|           | Total Percentage                  | 537          |               | 438.0            | 100.0%             |

- rule\_id: 4 (Followup Rule)

Active in participant groups: 1  
 Time to expire: 3 hours, 30 mins

Rule-specific parameters

Triggering question: support\_occurrence (page 19)  
 Delay between triggering question and this one: 0 sec(s)  
 Triggering answers: 1,2,3,4,5,6

## support\_occurrence

Column name: support\_occurrence\_#choice\_id  
 Question Text: At what times did you attend a sober support meeting  
 <u>yesterday</u>? Select all that apply.  
 Description: No description provided by researcher  
 Question Type: multi\_select  
 Min: 1  
 Max: 6  
 Number of 0/1 columns: 10

| choice id | choice text                          | choice count | total percent | fractional count | fractional percent |
|-----------|--------------------------------------|--------------|---------------|------------------|--------------------|
| 1         | Between 12:01am and 9am              | 12           | 1.4%          | 12.0             | 1.6%               |
| 2         | Between 9:01am and Noon              | 58           | 6.8%          | 40.9             | 5.3%               |
| 3         | Between 12:01pm and 3pm              | 54           | 6.4%          | 38.2             | 5.0%               |
| 4         | Between 3:01pm and 6pm               | 57           | 6.7%          | 38.8             | 5.1%               |
| 5         | Between 6:01pm and 9pm               | 307          | 36.2%         | 283.8            | 37.0%              |
| 6         | Between 9:01pm and Midnight          | 31           | 3.7%          | 24.2             | 3.1%               |
| 999       | skipped                              | 1            | 0.1%          | 1.0              | 0.1%               |
| 1000      | unset                                | 0            | 0.0%          | 0.0              | 0.0%               |
| 1001      | expired                              | 0            | 0.0%          | 0.0              | 0.0%               |
| 1002      | I did not attend a meeting yesterday | 329          | 38.8%         | 329.0            | 42.8%              |
|           | Total Percentage                     | 849          |               | 768.0            | 100.0%             |

- rule\_id: 3 (Followup Rule)

Active in participant groups: 1  
 Time to expire: 3 hours, 30 mins

Rule-specific parameters

Triggering question: alcohol\_use (page 8)  
 Delay between triggering question and this one: 0 sec(s)  
 Triggering answers: any value,999

## urge\_GPS\_alcohol

Column name: urge\_GPS\_alcohol

Question Text: Please indicate how strong your urge is to drink alcohol <u>right now</u>, where 0 is no urge and 10 is the strongest urge.

Description: No description provided by researcher

Question Type: single\_select

| value | choice text         | choice count | total percent |
|-------|---------------------|--------------|---------------|
| 1     | 0 (no urge)         | 497          | 78.9%         |
| 2     | 1                   | 28           | 4.4%          |
| 3     | 2                   | 20           | 3.2%          |
| 4     | 3                   | 24           | 3.8%          |
| 5     | 4                   | 17           | 2.7%          |
| 6     | 5                   | 28           | 4.4%          |
| 7     | 6                   | 3            | 0.5%          |
| 8     | 7                   | 8            | 1.3%          |
| 9     | 8                   | 0            | 0.0%          |
| 10    | 9                   | 0            | 0.0%          |
| 11    | 10 (strongest urge) | 1            | 0.2%          |
| 999   | skipped             | 1            | 0.2%          |
| 1000  | unset               | 0            | 0.0%          |
| 1001  | expired             | 3            | 0.5%          |
|       | Total               | 630          |               |
|       | Percentage          |              | 100.0%        |

- rule\_id: 15 (Followup Rule)

Active in participant groups: 1

Time to expire: 1 hour

Rule-specific parameters

Triggering question: affect\_GPS\_alcohol (page 5)

Delay between triggering question and this one: 0 sec(s)

Triggering answers: any value,999

## urge\_extent

Column name: urge\_extent

Question Text: Please indicate how strong your urge is to drink alcohol <u>right now</u>, where 0 is no urge and 10 is the strongest urge.

Description: No description provided by researcher

Question Type: single\_select

| value | choice text         | choice count | total percent |
|-------|---------------------|--------------|---------------|
| 1     | 0 (no urge)         | 1690         | 66.2%         |
| 2     | 1                   | 185          | 7.2%          |
| 3     | 2                   | 146          | 5.7%          |
| 4     | 3                   | 96           | 3.8%          |
| 5     | 4                   | 67           | 2.6%          |
| 6     | 5                   | 75           | 2.9%          |
| 7     | 6                   | 26           | 1.0%          |
| 8     | 7                   | 14           | 0.5%          |
| 9     | 8                   | 8            | 0.3%          |
| 10    | 9                   | 8            | 0.3%          |
| 11    | 10 (strongest urge) | 22           | 0.9%          |
| 999   | skipped             | 1            | 0.0%          |
| 1000  | unset               | 11           | 0.4%          |
| 1001  | expired             | 204          | 8.0%          |
|       | Total               | 2553         |               |
|       | Percentage          |              | 100.0%        |

- rule\_id: 7 (Time Rule)

Active in participant groups: 1

Time to expire: 3 hours, 30 mins

Rule-specific parameters

Time schedule: At 02:00 PM and 08:00 PM

- rule\_id: 8 (Followup Rule)

Active in participant groups: 1

Time to expire: 3 hours, 30 mins

Rule-specific parameters

Triggering question: AA\_importance (page 3)

Delay between triggering question and this one: 0 sec(s)

Triggering answers: any value,999

List of disabled questions

1. If you attended a sober support meeting in the <u>last three hours</u>, please indicate which of the following activities you were involved in? Select all that apply.
2. If you attended a sober support meeting in the <u>last three hours</u>, please indicate which of the following activities you were involved in? Select all that apply.
3. If you attended a sober support meeting in the <u>last three hours</u>, please indicate which of the following activities you were involved in? Select all that apply.
4. How are you feeling <u>right now</u>?
5. How are you feeling <u>right now</u>?
